# Supplementary material for: The Effect of Wenxin Keli on the mRNA Expression Profile of Rabbits with Myocardial Infarction
Source: Evid Based Complement Alternat Med. 2016 Oct 24;2016:2352614. doi: 10.1155/2016/2352614 (PMC5098077; doi:10.1155/2016/2352614)
Supplement: Supplementary file 2 [file 2352614.f2.xls]

## Sheet: Tabel 1
Altered genes induced by ligation of the left anterior descending coronary								Altered genes induced by WXKL treatment
Regulation	Model	Sham	GeneSymbol	RefSeqAccession				Regulation	WXKL	Model	GeneSymbol	RefSeqAccession
up	7.62318	6.4496	GNA15	NM_001082715				up	6.52175	4.5791	PHGDH	XM_002715676
up	6.52957	5.27857	CD53	XM_008264710				up	9.70409	8.58037	LOC100009551	NM_001082765
up	6.15126	4.879	MEP1B	XM_008261183				up	7.2796	5.13286	PTGER3	XM_008263982
up	5.82425	4.05528	ABCC3	XM_008271295				up	11.287	10.2123	NUDT4	XM_008256878
up	4.1444	1.61844	CLEC4A	XM_002712758				up	5.38228	4.29229	RYR1	NM_001101718
up	8.54061	7.5358	ALOX5AP	XM_002720606				up	6.94959	5.81255	LOC100358736	XM_002721588
up	4.04916	2.85656	CREB5	XM_008261567				up	6.21891	2.83796	CYP2A10	NM_001171049
up	5.99796	4.77994	PALM2	NM_001204216				up	6.66581	5.53117	NT5DC3	XM_008256994
up	3.78599	2.71444	KYNU	XM_002712137				up	9.39238	8.17173	DKK2	XM_002717198
up	7.6724	6.20541	IRF5	XM_002712052				up	4.53031	2.09738	FBP1	XM_002708294
up	4.49815	3.41106	LITAF	XM_002711751				up	6.09962	4.08773	CRYM	XM_002711835
up	15.3714	14.2863	CYP7A1	NM_001170929				up	6.89462	5.88687	RASGEF1B	XM_008267685
up	4.09612	2.52372	THEMIS	XM_008263480				up	7.31514	6.24672	RASGEF1B	XM_008267685
up	4.56408	2.70121	SLC35G1	XM_008270221				up	9.48696	8.30167	DKK2	XM_002717198
up	7.76928	6.37692	AMICA1	XM_008249426				up	9.51717	8.2868	DKK2	XM_002717198
up	6.03919	4.57	PSAT1	NM_001082271				up	8.3918	7.29977	LOC100348835	XM_008262466
up	5.74568	3.50876	LOC100009259	NM_001082392				up	9.77507	8.50065	AMBRA1	XM_002709077
up	4.98813	3.05112	CD1B	NM_001089312				up	7.10895	5.84753	LOC100351210	XM_008250873
up	7.42598	5.49123	MAMDC2	XM_002708194				up	6.23626	4.08674	RSPO3	XM_002714805
up	6.01137	2.26225	LOC100009168	NM_001082327				up	5.86645	3.79253	CRYM	XM_002711835
up	4.65707	2.34789	TLR10	NM_001297501				up	9.45136	8.27784	DKK2	XM_002717198
up	9.40007	7.84493	C1QC	XM_002715988				up	6.15564	3.78814	PTGER3	XM_008263982
up	8.99807	7.95996	GLIPR1	XM_002711344				up	4.73957	2.98324	TACR3	NM_001082055
up	8.57784	7.51829	ALOX5AP	XM_002720606				up	3.97688	2.79803	IGDCC4	XM_008268883
up	4.20653	2.7828	PALM2	NM_001204216				up	4.4731	3.30692	MYB	XM_002714835
up	4.82258	1.75456	ZP1	NM_001270480				up	6.86031	4.90889	DFNB31	XM_008273395
up	7.20133	5.82982	CRISPLD1	XM_002710644				up	8.38987	7.31555	TMA16	XM_008273501
up	5.49414	3.98452	AP1G2	XM_008269387				up	7.51414	6.07906	LOC100351210	XM_008250873
up	3.99634	2.84544	FMN1	XM_008269255				up	5.49114	4.26511	GPR137C	XM_002718247
up	5.01482	2.74391	CD1B	NM_001089312				up	4.90915	3.12002	RFT-II	NM_001082402
up	7.49129	5.73117	AOAH	NM_001082025				up	8.62008	7.4315	MLNR	NM_001099967
up	9.33009	7.73223	RLA-DMB	NM_001190433				up	9.413	8.17095	DKK2	XM_002717198
up	8.13833	6.97396	CCDC109B	XM_008267492				up	5.82187	4.66175	LOC100347582	XM_008264104
up	8.66798	7.66333	CD74	XM_008255262				up	8.1782	6.67322	MMP1	NM_001171139
up	8.577	7.5191	DOCK8	XM_008256091				up	6.11795	5.06408	ADAMTSL3	XM_008275279
up	6.6692	5.20975	GPR183	XM_002712943				up	6.74699	5.19712	LOC100349425	XM_002717166
up	9.10701	7.70383	VCAM1	NM_001082152				up	4.09455	2.07748	FAAH2	XM_008272691
up	5.70702	4.29729	P2RY13	XM_002716272				up	6.7666	5.55269	SLC5A1	NM_001101692
up	7.36147	6.12765	HNMT	XM_002712127				up	5.44563	4.377	SLC5A2	NM_001082669
up	4.75765	3.73186	SLC5A10	NM_001082699				up	8.35621	6.77297	PSAT1	NM_001082271
up	4.72461	3.48837	COL4A5	XM_002720175				up	6.71177	5.53535	PRLR	NM_001082231
up	4.9481	3.47598	ABCC3	XM_008271295				up	4.62277	3.23995	FAM169A	XM_008274546
up	3.51674	2.29857	KCNIP1	XM_002710374				up	5.40644	4.06829	LOC100328937	NM_001171121
up	6.3984	4.88321	KIAA0226L	XM_008259983				up	7.50081	6.47829	CCDC54	XM_002716722
up	9.39369	7.86097	RLA-DMB	NM_001190433				up	4.09558	2.2993	ARHGAP20	XM_008261707
up	5.28618	3.95312	SIPA1L3	XM_002711497				up	4.35519	2.58204	SLC16A12	XM_002718378
up	5.68704	4.28191	LCP2	XM_002710373				up	5.18134	4.10056	LOC100338621	XM_002723416
up	8.25178	6.91153	C1QB	XM_008265707				up	6.90694	4.95941	LOC100351210	XM_008250873
up	4.90638	3.4751	MLXIP	XM_002722734				up	5.73668	4.7234	NYNRIN	XM_002718108
up	4.12723	2.50586	SLA	XM_008255928				up	3.69728	2.29121	KCTD19	XM_008257451
up	10.3358	9.33281	C1S	XM_008259769				up	7.09837	4.99613	OTUD6A	XM_002720076
up	8.69799	7.52758	CCDC109B	XM_008267492				up	6.69755	5.14243	SLC16A6	XM_002719491
up	7.81521	6.78405	HNMT	XM_002712127				up	6.8126	5.16454	PTGER3	NM_001082671
up	7.48329	5.77398	ITGB3	NM_001082066				up	6.41195	5.393	GPR63	XM_002714593
up	4.9813	3.65266	CX3CR1	NM_001082134				up	3.97271	2.89453	FRRS1L	XM_008255396
up	4.58574	3.32309	P2RY13	XM_002716272				up	8.78217	7.75559	PLA2G2D	XM_002716049
up	8.35553	6.75282	ITGB3	NM_001082066				up	4.50261	3.10374	PLA2G2C	XM_008265775
up	7.2399	5.26686	IL18	NM_001122940				up	4.78622	3.69779	SMAP2	XM_002715186
up	8.47451	6.93714	RLA-DR-ALPHA	NM_001171118				up	6.97612	4.99845	PTGER3	XM_008263982
up	4.36679	3.30877	SLC2A3	XM_008259792				up	6.42789	5.32249	SULT2B1	NM_001082176
up	3.71952	2.49333	LOC100353681	XM_008263054				up	5.84769	4.24921	HOXA2	NM_001171398
up	4.11904	3.04882	SGPL1	XM_008270007				up	4.00607	2.77649	SLC5A1	NM_001101692
up	3.9049	2.29087	ITGA4	XM_002712227				up	4.71227	3.58539	LOC100337823	XM_002716804
up	12.0168	10.4906	RLA-DMA	NM_001190432				up	6.04732	4.81581	TPRG1	XM_002716505
up	3.29664	2.0754	CSN1S1	NM_001082391				up	6.74038	4.88433	MYOG	NM_001177749
up	4.49096	2.36723	TLR10	NM_001297501				up	4.22126	2.82738	PLA2G1B	XM_002719793
up	8.45015	6.87106	MS4A4A	XM_008271854				up	7.45804	6.17067	PIPOX	XM_002718915
up	7.95167	6.50783	ITGB3	NM_001082066				up	4.88494	3.70563	WFDC2	NM_001082354
up	6.82157	4.91404	IL18	NM_001122940				up	4.14637	2.91107	SUSD1	XM_008253165
up	8.71063	7.28531	NCF4	NM_001082654				up	4.59596	3.31158	LOC100353769	XM_008257863
up	7.77535	6.49571	MS4A4A	XM_008271854				up	5.93846	4.87714	TPRG1	XM_002716505
up	5.11879	3.22696	HDC	XM_002717805				up	8.5673	7.52304	DFFB	XM_008253882
up	9.73465	8.12344	VCAM1	NM_001082152				up	4.33069	3.25687	PTPRH	XM_008253996
up	4.23644	2.36724	RHBDL2	XM_008265526				up	11.1578	10.1251	TMEM19	XM_002711334
up	3.79343	2.61839	DCLK2	XM_008267351				up	6.61633	5.51177	LOC100351626	XM_002708170
up	4.74119	2.84649	WNT10A	XM_002712483				up	5.90813	4.70645	FHDC1	XM_008267311
up	3.64246	2.49916	TECPR2	XM_008248658				up	8.37293	6.47196	TRIM46	XM_008264356
up	4.24961	3.0834	SLC38A6	XM_002719547				up	5.51516	4.28974	ARMC2	XM_008263341
up	9.25024	7.91657	RNASE6	XM_008269307				up	6.93238	4.69669	F2	XM_002709082
up	8.21677	5.87673	BDKRB1	NM_001082347				up	6.23677	3.86188	F2	XM_002709082
up	4.48532	3.07696	PALM2	NM_001204216				up	4.67327	3.58513	CDH9	XM_002714092
up	5.85272	3.89885	LOC100342424	XM_008264455				up	6.34105	5.21746	CRB1	XM_008268707
up	5.03469	4.01022	KCNE3	XM_008264060				up	4.52372	3.1604	FGF12	XM_002716514
up	8.63995	7.00006	MRC1	XM_002717356				up	7.37611	6.36793	CCDC171	XM_008254567
up	3.95592	2.58455	APOBEC1	NM_001082341				up	5.37759	4.26626	SYK	XM_008257975
up	6.79299	4.34168	CCL2	NM_001082294				up	5.70193	4.43569	LOC100353933	XM_002714910
up	4.25402	3.14631	LOC100353013	XM_008258104				up	6.52456	5.50288	UCN	XM_008254603
up	7.49586	6.44492	RHBDD1	XM_008259252				up	4.72444	3.33634	SLC35F3	XM_008268252
up	4.29727	2.49368	CCDC89	XM_008263165				up	5.78336	3.80799	LOC100351210	XM_008250873
up	4.11756	2.65306	CARD6	XM_002714122				up	7.31835	6.18431	PRRC2B	XM_002721942
up	5.98667	4.60193	EVI2A	XM_008271051				up	7.57746	6.54218	RNF186	XM_008265780
up	6.13834	4.92633	TMEM37	XM_002712402				up	5.31061	3.73557	FGF12	XM_002716514
up	7.46966	6.46362	BCAR3	XM_008264863				up	8.39255	7.33897	ANKMY2	XM_008274079
up	13.2738	12.2074	LOC103346332	XM_008252285				up	6.60081	5.57725	LOC100351626	XM_002708170
up	5.89383	2.48401	FADS6	XM_008252129				down	4.51346	6.52957	CD53	XM_008264710
up	7.52527	5.8358	PRKCB	NM_001101723				down	2.47785	4.1444	CLEC4A	XM_002712758
up	7.2614	6.1221	CD53	XM_008264710				down	3.11507	4.20139	TMEM212	XM_002716321
up	5.31503	4.09992	GGH	XM_002710524				down	5.8015	6.98577	LOC100338913	XM_008264182
up	6.62276	4.98448	VCAM1	NM_001082152				down	7.07175	8.10549	CRTAP	XM_002716227
up	4.9773	3.66249	LYVE1	XM_002708812				down	2.73747	4.06419	ATP10D	XM_002709284
up	7.72535	6.2038	PRKCB	NM_001101723				down	3.38225	4.39788	LOC100350959	XM_002722912
up	6.85814	5.68245	CD53	XM_008264710				down	3.10964	4.44111	LOC100350716	XM_002723942
up	4.96169	3.16536	ICAM5	NM_001171150				down	4.73399	6.78956	CD53	XM_008264710
up	9.30732	7.5976	RLA-DMB	NM_001190433				down	3.80715	4.82327	IGSF6	XM_008257871
up	7.33067	6.04472	RLA-DR-ALPHA	NM_001171118				down	6.9395	7.98508	CRTAP	XM_002716227
up	8.97403	7.59837	MRC1	XM_002717356				down	2.88992	4.24536	PROSER1	XM_002721091
up	5.4205	3.95244	GPR183	XM_002712943				down	8.54613	9.99565	TRMT1L	XM_008249919
up	3.9951	2.29264	SLA	XM_008255928				down	8.26812	9.39369	RLA-DMB	NM_001190433
up	4.7315	2.64286	AOAH	NM_001082025				down	2.99213	4.60872	LOC100358696	XM_008264516
up	7.32056	5.24581	MAMDC2	XM_002708194				down	2.60378	4.9813	CX3CR1	NM_001082134
up	6.46776	2.74016	ITIH3	NM_001082008				down	3.54896	4.58574	P2RY13	XM_002716272
up	7.73354	6.55903	C3	NM_001082286				down	3.13896	4.17485	GPR113	XM_008254656
up	5.27423	3.37353	FPR1	NM_001082314				down	6.63694	8.47451	RLA-DR-ALPHA	NM_001171118
up	4.25462	2.99159	TNFAIP8	XM_008254928				down	1.77564	3.94327	LOC100358696	XM_008264516
up	5.87386	4.45701	PALM2	NM_001204216				down	4.40151	5.68067	LY86	XM_002714160
up	3.80106	1.70138	SLC46A1	NM_001082630				down	4.64774	6.18903	TMEM231	XM_008257630
up	9.00451	7.11258	CCL2	NM_001082294				down	6.82131	8.45015	MS4A4A	XM_008271854
up	7.60336	6.44397	HNMT	XM_002712127				down	1.78048	3.86045	SLC24A5	XM_002717863
up	4.33898	3.12918	CAMK1D	XM_008268092				down	3.73231	5.19618	LOC100350716	XM_002723942
up	7.21328	5.55024	VSIG4	XM_008272724				down	6.0055	7.77535	MS4A4A	XM_008271854
up	7.38843	5.3853	IL18	NM_001122940				down	6.70361	7.79472	TSPAN6	XM_002720393
up	5.27404	2.53119	LOC100008826	XM_008253604				down	3.21013	4.23644	RHBDL2	XM_008265526
up	4.65285	1.6228	MSR1	NM_001082248				down	11.0793	12.3893	ACE	NM_001082395
up	7.47903	5.51498	IL18	NM_001122940				down	3.73783	4.83281	GGH	XM_002710524
up	5.61922	4.4745	LYVE1	XM_002708812				down	3.28201	4.39454	TUBGCP5	XM_008269727
up	9.14839	7.5543	MRC1	XM_002717356				down	3.94584	6.48008	PBLD	XM_008270051
up	4.19757	3.08069	CLEC4A	XM_002712758				down	3.60501	5.44307	TTC5	XM_008269286
up	9.49414	8.44541	GLIPR1	XM_002711344				down	4.39727	5.85272	LOC100342424	XM_008264455
up	6.76815	5.69577	DOCK11	XM_008272922				down	6.63541	8.63995	MRC1	XM_002717356
up	6.03738	4.31899	PRKCB	NM_001101723				down	6.86189	7.97732	CRTAP	XM_002716227
up	7.77091	5.79367	CCL2	NM_001082294				down	6.74498	7.9321	CRTAP	XM_002716227
up	5.13865	2.36321	MSR1	NM_001082248				down	6.156	7.49586	RHBDD1	XM_008259252
up	6.60597	5.21536	LCP2	XM_002710373				down	9.27906	11.3842	LOC100343144	XM_002714510
up	6.54882	5.37843	CD53	XM_008264710				down	4.87737	5.98667	EVI2A	XM_008271051
up	9.28699	7.7911	IL1R2	XM_008253251				down	10.7981	12.099	ACE	NM_001082395
up	4.81042	2.88687	GCNT7	XM_008274141				down	5.23954	7.2614	CD53	XM_008264710
up	5.39778	3.57805	PTPRO	NM_001082750				down	4.27488	5.31503	GGH	XM_002710524
up	8.04482	6.89655	CCDC109B	XM_008267492				down	2.3673	4.96169	ICAM5	NM_001171150
up	8.66458	7.31607	COL5A3	XM_002722844				down	4.74781	5.85474	LY86	XM_002714160
up	7.2327	6.2283	BCAR3	XM_008264863				down	7.12788	8.97403	MRC1	XM_002717356
up	4.09631	2.15733	SYTL2	XM_008263138				down	2.92408	4.45264	PLVAP	XM_002724464
up	8.46131	6.61593	CCL2	NM_001082294				down	3.32723	5.27423	FPR1	NM_001082314
up	5.18186	3.06999	CD1B	NM_001089312				down	4.21267	5.30688	C1H9orf72	XM_008250224
up	7.9688	5.68543	MAMDC2	XM_002708194				down	7.74949	8.75214	MS4A4A	XM_008271854
up	7.54544	6.05099	RGS10	XM_002718688				down	4.08805	5.2349	IGSF6	XM_008257871
up	5.25814	3.60506	PTN	XM_002711960				down	4.52083	5.63014	PLEKHG1	XM_008263678
up	7.09467	4.95351	IL18	NM_001122940				down	5.25827	7.21328	VSIG4	XM_008272724
up	4.9599	1.9347	NT5E	XM_002714557				down	2.38613	3.40927	LMNB1	XM_002710176
up	7.62604	6.59664	TLR2	NM_001082781				down	7.43237	9.14839	MRC1	XM_002717356
up	3.99968	2.3957	ORC6	XM_002721560				down	2.70248	4.19757	CLEC4A	XM_002712758
up	8.81931	7.31913	LOC100349667	XM_008262755				down	6.04279	7.35983	QPCT	XM_008254537
up	4.09571	2.97335	ADPRH	XM_002716668				down	2.20301	3.60613	HCLS1	XM_008266857
up	4.84513	3.32904	SLC31A1	XM_002708114				down	3.60738	5.13865	MSR1	NM_001082248
up	5.59913	4.40916	LOC100351416	XM_008262758				down	4.12426	6.54882	CD53	XM_008264710
up	9.60589	8.04462	C1QA	XM_002715989				down	7.156	8.28317	CTSC	XM_002708644
up	4.42501	3.28328	CD200R1	XM_008266943				down	4.0674	5.19705	LOC100350716	XM_002723942
up	6.09051	4.17963	TSHZ2	XM_008274165				down	6.83314	8.81931	LOC100349667	XM_008262755
up	5.51585	4.30586	KIF5C	XM_008258563				down	4.18606	5.19759	ACKR4	XM_008266199
up	6.49326	5.34466	FYB	XM_008262138				down	7.48023	8.58802	ANGPTL7	XM_002723351
up	4.12826	1.06243	CXCL8	NM_001082293				down	10.7724	12.065	ACE	NM_001082395
up	5.64181	4.11088	PALM2	NM_001204216				down	5.55539	7.1713	MS4A4A	XM_008271854
up	5.74547	4.46206	LCP2	XM_002710373				down	3.77675	4.97925	TTF2	XM_008264600
down	6.65123	7.92332	C17H15orf65	XM_008268977				down	3.8916	4.97124	CATSPER4	XM_008265909
down	8.58037	10.3346	LOC100009551	NM_001082765				down	7.94328	9.22931	RLA-DMB	NM_001190433
down	5.61675	7.25463	TRAPPC3L	XM_008263403				down	9.62923	11.2027	ABCB1	NM_001082159
down	4.20228	5.44278	THPO	XM_008266593				down	3.2166	4.2611	TINAG	NM_001082786
down	3.70643	4.95255	KCNA2	NM_001082722
down	6.66583	7.97672	C17H15orf65	XM_008268977
down	1.94259	4.90391	GRIA2	XM_002716909
down	6.39596	7.75687	NAALAD2	XM_002708640
down	4.10246	7.27279	NEFM	XM_002709311
down	3.09635	4.13918	FGF12	XM_002716514
down	5.81255	7.32293	LOC100358736	XM_002721588
down	7.11593	8.606	SLN	NM_001082387
down	6.31525	8.08452	PIPOX	XM_002718915
down	6.34205	7.4015	CRY1	XM_002711421
down	4.66457	6.26595	ARHGAP28	XM_002713588
down	3.27765	4.99534	FGG	XM_002716891
down	5.97532	7.47393	CD4	NM_001082313
down	6.03349	9.25828	NEFM	XM_002709311
down	4.23542	5.83465	MORN5	XM_008273368
down	4.92299	6.54117	PKD1	XM_008253478
down	6.81949	8.07261	C17H15orf65	XM_008268977
down	4.95737	6.08011	TRIM58	XM_008251805
down	4.29363	6.77211	ZAP70	XM_008253649
down	3.50836	4.67412	PLP1	NM_001082328
down	9.2699	10.2701	SMTNL2	XM_002718852
down	5.80886	7.43607	SLC22A8	NM_001082121
down	2.63782	3.92478	CHST1	XM_002709072
down	6.04001	7.1404	CCDC126	XM_008261533
down	8.42451	9.45746	ASB15	XM_008258257
down	6.72353	7.91322	GPR174	XM_002720136
down	4.74982	7.00317	B3GAT2	XM_002714531
down	8.50065	9.69661	AMBRA1	XM_002709077
down	4.83946	7.02128	B3GAT2	XM_002714531
down	6.08819	7.49887	SLC22A8	NM_001082121
down	3.16919	5.14373	FANK1	XM_008274828
down	4.67133	6.85861	FANK1	XM_008274828
down	3.6511	4.74566	KCNE2	NM_001198937
down	3.03099	4.70343	HIF3A	XM_008252146
down	8.12124	9.44645	HSPB6	XM_002722225
down	5.89019	7.08004	C1H11orf1	XM_008261510
down	7.16307	8.35862	ACCS	XM_008270084
down	4.90023	7.05768	B3GAT2	XM_002714531
down	5.08364	8.01947	NEFM	XM_002709311
down	5.33372	6.61649	KCNA2	NM_001082722
down	5.48079	7.25292	TRAPPC3L	XM_008263403
down	6.38676	8.05436	PIPOX	XM_002718915
down	4.62964	5.94116	MYO1A	XM_002720912
down	3.55226	4.88563	CLRN3	XM_002721249
down	5.91928	7.45804	SLC22A8	NM_001082121
down	4.55401	5.63753	LRRC46	XM_002719124
down	7.53572	8.63578	GJA8	XM_002715651
down	3.0288	4.22691	CLRN3	XM_002721249
down	6.96966	8.28757	TTC39C	XM_008261148
down	2.79803	4.05241	IGDCC4	XM_008268883
down	3.30692	4.37275	MYB	XM_002714835
down	6.18757	7.33205	MFSD6	XM_002712257
down	4.90889	6.87509	DFNB31	XM_008273395
down	3.04849	4.40086	VIP	XM_008263707
down	5.83284	6.88771	CD82	XM_008270114
down	4.1019	5.75782	LOC100339107	XM_002721595
down	5.09463	7.01241	FANK1	XM_008274828
down	3.15351	4.5799	KIAA0247	XM_008248579
down	7.31555	8.51409	TMA16	XM_008273501
down	4.09785	5.2358	APCS	XM_002715288
down	3.60315	5.104	SLC15A1	NM_001082337
down	3.03209	4.05848	EGR4	XM_008254248
down	1.86083	4.27092	DNAI1	XM_008273469
down	2.34251	4.18682	NAV3	XM_008256837
down	6.21187	7.39739	LOC100328620	NM_001171079
down	2.76348	4.24888	DNAJC5B	XM_002710535
down	4.75587	6.25059	ARHGAP28	XM_002713588
down	4.26511	6.03699	GPR137C	XM_002718247
down	2.91381	4.12984	FGF10	XM_002714023
down	5.18542	6.6076	EXOC3L1	XM_008257440
down	6.48304	8.13111	PIPOX	XM_002718915
down	7.4315	9.16707	MLNR	NM_001099967
down	4.36472	5.80946	KCNA2	NM_001082722
down	5.81491	7.337	SPDL1	XM_002710369
down	5.19712	6.54	LOC100349425	XM_002717166
down	2.07748	4.38093	FAAH2	XM_008272691
down	2.70889	3.91961	FAAH2	XM_008272691
down	2.56403	4.22572	KCNE2	NM_001198937
down	2.63785	3.759	MS4A3	XM_008271816
down	4.07988	5.131	LOC100356551	XM_008258074
down	5.17071	6.27457	HEPACAM2	XM_008261726
down	9.60117	10.7625	NOL3	XM_008257436
down	3.22807	4.74601	OTOA	XM_008257915
down	7.11733	8.63302	LOC100343002	XM_008274187
down	6.47352	8.11742	PIPOX	XM_002718915
down	4.06829	5.54607	LOC100328937	NM_001171121
down	5.93721	7.21253	B3GAT2	XM_002714531
down	5.09639	6.23333	OTC	XM_002719837
down	3.70888	4.8735	LRP8	XM_008265226
down	6.79168	8.00479	C17H15orf65	XM_008268977
down	2.6669	3.80895	AFF3	XM_008253385
down	2.58204	4.47999	SLC16A12	XM_002718378
down	2.5773	4.00265	FGF10	XM_002714023
down	3.81741	4.82648	FBXW12	XM_008260589
down	9.25628	10.453	NAA40	XM_002721032
down	4.99613	8.60863	OTUD6A	XM_002720076
down	5.14243	7.11062	SLC16A6	XM_002719491
down	5.7761	7.37867	SLC22A8	NM_001082121
down	3.01	4.17593	VPS37B	XM_002724371
down	2.89453	4.15807	FRRS1L	XM_008255396
down	7.75559	9.30721	PLA2G2D	XM_002716049
down	3.10374	4.79432	PLA2G2C	XM_008265775
down	5.02838	6.10837	STAM	XM_008268295
down	5.32249	6.99868	SULT2B1	NM_001082176
down	3.72776	4.88012	SLC17A8	XM_008256948
down	3.15239	4.43705	KCNE2	NM_001198937
down	6.71044	7.96234	TTC39C	XM_008261148
down	2.2538	4.4274	VIP	XM_008263707
down	4.81581	6.5552	TPRG1	XM_002716505
down	4.88433	6.64076	MYOG	NM_001177749
down	2.82738	4.19773	PLA2G1B	XM_002719793
down	5.57457	7.42672	FANK1	XM_008274828
down	6.17067	7.89767	PIPOX	XM_002718915
down	8.79604	10.1843	TMEM88	XM_002718783
down	3.31158	4.82902	LOC100353769	XM_008257863
down	4.87714	6.18816	TPRG1	XM_002716505
down	5.06597	6.24943	TPRG1	XM_002716505
down	3.41151	4.5861	TMEM255A	XM_002720401
down	2.78736	4.76035	HAPLN1	XM_002713896
down	10.1251	11.5075	TMEM19	XM_002711334
down	3.60414	4.66008	SNAP91	XM_002714554
down	4.70645	5.73474	FHDC1	XM_008267311
down	6.47196	8.00174	TRIM46	XM_008264356
down	2.01279	3.64964	FGF10	XM_002714023
down	7.03781	8.08321	GSTO2	XM_008270483
down	6.65162	7.75345	FAM168A	XM_008264278
down	4.28974	5.76064	ARMC2	XM_008263341
down	5.73168	7.34326	SLC22A8	NM_001082121
down	5.53435	7.01172	FAM73B	XM_008252730
down	4.38808	5.9052	SHISA2	XM_002712794
down	7.46949	8.5231	RASL12	XM_002718046
down	2.65	3.93252	LOC100343587	XM_008269595
down	6.41024	7.80342	C17H15orf65	XM_008268977
down	3.18548	4.45514	PLP1	NM_001082328
down	5.34502	7.31674	FANK1	XM_008274828
down	1.3562	3.68693	ARG1	NM_001082108
down	5.21746	6.26343	CRB1	XM_008268707
down	4.71098	5.81105	LOC100347873	XM_002708549
down	6.36793	7.36981	CCDC171	XM_008254567
down	2.30946	4.07148	KCTD4	XM_008259998
down	5.29606	7.16468	CNBD2	XM_002710782
down	4.48134	6.78033	B3GAT2	XM_002714531
down	4.26626	5.27993	SYK	XM_008257975
down	3.33634	4.7425	SLC35F3	XM_008268252
down	4.60068	5.71641	KCNA2	NM_001082722
down	2.96551	4.43106	DYDC1	XM_002720972
down	3.77391	5.51566	ADAMTSL1	XM_008254434
down	2.68251	4.03494	PLP1	NM_001082328
down	7.33897	8.37189	ANKMY2	XM_008274079
down	7.06426	8.28046	GLDC	XM_002708098

## Sheet: Table 2
Altered genes after WXKL treatment
Up-regulated GeneSymbol	RefSeqAccession	Down-regulated GeneSymbol	RefSeqAccession
OTUD6A	XM_002720076	ICAM5	NM_001171150
FAAH2	XM_008272691	CD53	XM_008264710
DFNB31	XM_008273395	CX3CR1	NM_001082134
TRIM46	XM_008264356	MRC1	XM_002717356
MYOG	NM_001177749	LOC100349667	XM_008262755
SLC16A12	XM_002718378	VSIG4	XM_008272724
FGF12	XM_002716514	FPR1	NM_001082314
SLC16A6	XM_002719491	RLA-DR-ALPHA	NM_001171118
LOC100349425	XM_002717166	MS4A4A	XM_008271854
PLA2G2C	XM_008265775	CLEC4A	XM_002712758
PLA2G1B	XM_002719793	MSR1	NM_001082248
SLC35F3	XM_008268252	LOC100342424	XM_008264455
LOC100328937	NM_001171121	RHBDD1	XM_008259252
PIPOX	XM_002718915	RLA-DMB	NM_001190433
LOC100353769	XM_008257863	EVI2A	XM_008271051
AMBRA1	XM_002709077	GGH	XM_002710524
TPRG1	XM_002716505	P2RY13	XM_002716272
GPR137C	XM_002718247	RHBDL2	XM_008265526
ARMC2	XM_008263341
FHDC1	XM_008267311
MLNR	NM_001099967
IGDCC4	XM_008268883
MYB	XM_002714835
LOC100358736	XM_002721588
LOC100009551	NM_001082765
CRB1	XM_008268707
SYK	XM_008257975
SULT2B1	NM_001082176
FRRS1L	XM_008255396
TMA16	XM_008273501
ANKMY2	XM_008274079
TMEM19	XM_002711334
PLA2G2D	XM_002716049
CCDC171	XM_008254567

## Sheet: Table 3
WXKL versus Sham								WXKL versus Captopril
Regulation	WXKL	Sham	GeneSymbol	RefSeqAccession				Regulation	WXKL	Captopril	GeneSymbol	RefSeqAccession
up	7.25143	2.37385	SPATS1	XM_002714451				up	6.52175	4.26914	PHGDH	XM_002715676
up	13.2718	8.52969	HP	NM_001082110				up	5.7221	4.17628	KCND2	NM_001082118
up	6.9387	2.74016	ITIH3	NM_001082008				up	8.32065	7.06437	IGF1	NM_001082026
up	6.26793	2.26225	LOC100009168	NM_001082327				up	9.38304	7.3546	LOC100328910	NM_001171097
up	6.36976	2.37862	AQP8	XM_002711852				up	6.29026	5.26856	AR	NM_001195724
up	5.17392	1.9347	NT5E	XM_002714557				up	7.03696	5.99022	POC1B	XM_008256874
up	5.89287	2.68295	OSR1	XM_008254763				up	9.02419	8.0238	SMC3	XM_002718739
up	4.27482	1.17473	C13H1orf110	XM_002715239				up	3.92431	2.25875	SH3RF1	XM_002709468
up	7.62392	4.57	PSAT1	NM_001082271				up	4.08774	3.03788	PIEZO2	XM_008261025
up	6.21891	3.2555	CYP2A10	NM_001171049				up	7.62392	5.32312	PSAT1	NM_001082271
up	5.57041	2.6281	FAM25A	XM_002718347				up	8.16222	6.25279	WASF2	XM_002716090
up	8.77559	5.87673	BDKRB1	NM_001082347				up	7.64539	6.34267	BICC1	XM_002718481
up	9.20173	6.33519	EPYC	XM_002711383				up	8.00246	6.98139	FNBP4	XM_008270726
up	9.40345	6.55288	THBS1	XM_002717799				up	5.47861	1.72526	FOXN4	XM_002723178
up	8.23385	5.44428	CTHRC1	XM_002710591				up	5.29375	3.15015	CADM2	XM_008267104
up	9.16032	6.42353	ALDOC	XM_002718926				up	4.23807	3.10228	FGFR1OP2	XM_002712698
up	7.67314	4.95351	IL18	NM_001122940				up	4.24426	2.60596	NCKAP5	XM_008258494
up	3.76199	1.06243	CXCL8	NM_001082293				up	6.39216	2.91597	FGF7	NM_001195837
up	4.53031	1.83785	FBP1	XM_002708294				up	8.86045	7.7949	TMEM263	XM_002711423
up	6.35314	3.67782	PTGER3	NM_001122935				up	4.79896	3.60107	ATP1B2	NM_001082780
up	5.46638	2.82531	LOC100339859	XM_002721845				up	5.53404	3.94408	AP1G2	XM_008269387
up	4.93044	2.39362	DIAPH3	XM_002712977				up	9.3004	7.96632	FLVCR2	XM_002719577
up	8.23851	5.79055	APOE	NM_001082643				up	12.0929	10.7247	RARRES2	XM_008250085
up	4.59804	2.25114	SCN1A	XM_002712249				up	9.30385	8.16989	MPZL2	XM_002722194
up	4.50796	2.18339	CAMP	NM_001082305				up	4.45099	3.44419	MST1	XM_008260652
up	4.82874	2.53119	LOC100008826	XM_008253604				up	7.69788	6.52136	SH3D19	XM_008267336
up	7.75458	5.51906	FMO1	NM_001082285				up	11.0917	8.69624	LOC100356976	XM_002714295
up	7.34542	5.20722	OTUD3	XM_002716005				up	4.32256	3.31633	PTPRJ	XM_008272471
up	8.37816	6.27055	IGF1	NM_001082026				up	7.32872	5.61213	SFXN1	XM_002710391
up	4.9013	2.84649	WNT10A	XM_002712483				up	5.80319	4.6219	RASSF4	XM_008250112
up	6.27403	4.24794	VCAN	XM_008261910				up	4.27482	2.29552	C13H1orf110	XM_002715239
up	4.66157	2.70121	SLC35G1	XM_008270221				up	8.27138	7.08038	DOCK8	XM_008256091
up	14.6847	12.7355	COL1A2	NM_001195668				up	5.53297	4.32291	KIF5C	XM_008258563
up	6.52175	4.57808	PHGDH	XM_002715676				up	6.21891	3.2383	CYP2A10	NM_001171049
up	6.88988	4.96805	CALML4	XM_008268840				up	8.25961	7.24312	BAG4	XM_002720783
up	9.38304	7.48625	LOC100328910	NM_001171097				up	11.0788	10.0705	FAM46A	XM_002714547
up	6.23626	4.36083	RSPO3	XM_002714805				up	8.23851	5.15238	APOE	NM_001082643
up	10.7436	8.88897	OGN	NM_001082116				up	9.39238	7.53251	DKK2	XM_002717198
up	5.82427	3.98312	CAPN5	XM_008263659				up	6.36976	2.78386	AQP8	XM_002711852
up	7.78612	6.02257	ACSL6	NM_001171343				up	6.34276	5.224	PAWR	XM_002711359
up	10.7594	9.01538	SLC1A5	NM_001082378				up	5.73626	4.66035	ZNF366	XM_002721109
up	6.03292	4.29857	DPYSL3	XM_002710291				up	9.73485	8.72369	SENP2	XM_008266582
up	9.06856	7.37179	CAPS	NM_001082644				up	5.77185	3.31369	NAT9	XM_002723583
up	4.05889	2.37435	BEX4	XM_008273122				up	8.34236	7.28966	IMPACT	NM_001082640
up	4.46551	2.7828	PALM2	NM_001204216				up	7.93094	6.36821	IL18	NM_001122940
up	3.94537	2.28583	NUF2	XM_008264152				up	10.7594	9.60684	SLC1A5	NM_001082378
up	11.7855	10.1279	IGFBP6	XM_002711012				up	8.49858	7.48215	PHIP	XM_008263130
up	7.78086	6.13242	EGR1	XM_002710239				up	9.75103	8.52307	HLTF	NM_001082376
up	10.8451	9.20867	CLU	NM_001082049				up	8.3918	6.94147	LOC100348835	XM_008262466
up	4.97751	3.34762	FN1	XM_008259120				up	5.04929	3.71292	STEAP2	NM_001171275
up	8.43225	6.81413	TNFAIP6	NM_001082311				up	5.24879	3.52775	LOC100343291	XM_008255573
up	5.53404	3.98452	AP1G2	XM_008269387				up	6.26209	4.91774	PLSCR4	XM_008266289
up	5.58241	4.07444	CA13	XM_002710668				up	4.12577	3.03583	HGF	NM_001168707
up	6.59672	5.09535	LOC100354746	XM_002723026				up	4.41489	3.35431	TBC1D12	XM_008270224
up	5.11571	3.61448	MMD	XM_002719282				up	10.9096	9.81707	ARCN1	XM_008249455
up	10.1031	8.64452	COL5A2	XM_002712334				up	8.41976	7.32309	CEP78	XM_002708220
up	7.13704	5.68543	MAMDC2	XM_002708194				up	5.89287	2.44121	OSR1	XM_008254763
up	5.74643	4.30871	TSHZ2	XM_008274165				up	5.13916	4.05691	ADAMTS5	XM_002716775
up	5.74538	4.33971	HUS1B	XM_008248491				up	9.75341	8.57232	FGL2	XM_002712098
up	7.32872	5.92668	SFXN1	XM_002710391				up	4.39521	3.36881	N4BP2	XM_008275219
up	9.3004	7.90704	FLVCR2	XM_002719577				up	8.62619	7.56961	2015-09-11	XM_008267702
up	8.09993	6.71674	LOC100009166	NM_001082325				up	4.63231	3.42604	CPEB3	XM_008270193
up	6.80903	5.43545	FGF9	XM_002712799				up	10.1148	9.09175	TFPI	NM_001101714
up	7.88279	6.5214	KAZALD1	XM_002718621				up	4.35118	2.96432	VAV3	XM_002715817
up	8.87998	7.53191	LEPREL4	XM_002719387				up	6.55164	5.22191	ABCA1	XM_008257418
up	8.59953	7.26033	MPZL2	XM_002722194				up	5.25307	3.98723	FGF12	XM_002716514
up	4.81536	3.49519	PTPN13	XM_008267633				up	3.68986	2.62713	TET2	XM_002717196
up	8.33786	7.02235	LOC100349893	XM_002708609				up	8.46028	7.07329	THRAP3	XM_002720684
up	4.8873	3.5719	PAMR1	XM_008269766				up	7.14092	5.98761	COPA	XM_002715236
up	5.61583	4.30586	KIF5C	XM_008258563				up	8.0859	6.51401	LOC100340711	XM_008250184
up	8.21159	6.90604	BICC1	XM_002718481				up	8.91539	7.77504	MIER1	XM_008265093
up	8.0859	6.79609	LOC100340711	XM_008250184				up	8.84938	7.84503	LOC100340044	XM_008252712
up	4.89983	3.63862	DRAM1	XM_002711225				up	6.28019	4.52716	NT5E	XM_002714557
up	9.57936	8.32334	BCO2	XM_008261401				up	4.70569	3.47272	TGFBR1	XM_008262084
up	6.09776	4.85219	HS3ST1	XM_002709358				up	4.4457	2.39372	PDE3B	XM_002708827
up	5.29057	4.05528	ABCC3	XM_008271295				up	10.8451	9.30494	CLU	NM_001082049
up	3.71342	2.49333	LOC100353681	XM_008263054				up	10.6527	9.55495	IGSF10	XM_002716279
up	5.17098	3.95312	SIPA1L3	XM_002711497				up	4.75741	3.07673	PTN	XM_002711960
up	4.24739	3.03367	PKD2	XM_002717010				up	5.57041	3.71939	FAM25A	XM_002718347
up	4.85934	3.64584	HGF	NM_001168707				up	5.58241	4.57742	CA13	XM_002710668
up	8.07634	6.88118	PTPRD	XM_008254833				up	9.68239	8.14396	POSTN	XM_002721081
up	6.94642	5.77826	2015-09-06	XM_008272931				up	5.14899	4.13545	AMMECR1L	XM_008258443
up	7.90329	6.75787	MDK	NM_001082167				up	6.17412	4.65303	BACH1	XM_008267171
up	4.55771	3.41744	CA5B	XM_002719890				up	4.17799	1.88373	LOC100358848	XM_008251377
up	3.46104	2.32522	SLC2A3	XM_008259792				up	9.57936	8.48045	BCO2	XM_008261401
up	7.41578	6.28216	CAPG	XM_002709674				up	8.33786	6.97205	LOC100349893	XM_002708609
up	3.84317	2.72209	TRIB2	XM_002710045				up	10.2491	6.28629	LOC100009097	XM_008252725
up	8.1782	7.06487	MMP1	NM_001171139				up	5.50939	4.00843	LYVE1	XM_002708812
up	9.33919	8.22612	TPM4	XM_002722089				up	4.11837	3.03141	MCTP1	XM_008261941
up	9.84494	8.73224	ECM2	XM_002708224				up	4.44783	3.13358	DENND2C	XM_008264627
up	3.92431	2.83058	SH3RF1	XM_002709468				up	3.70031	1.90933	TNFSF13B	NM_001099964
up	4.89618	3.82355	CTTNBP2	NM_001171037				up	4.73301	3.44103	LEF1	XM_008267506
up	8.61005	7.54362	WBP5	XM_008273060				up	12.5392	10.53	C1RL	XM_002712847
up	3.91562	2.85726	ROBO1	XM_008267112				up	5.28605	3.6748	ACSS3	XM_002711267
up	6.35492	5.31931	SLC4A7	NM_001195836				up	5.49554	4.41092	KIF26B	XM_008268162
up	6.94297	5.90917	NAA25	XM_002719754				up	8.34302	7.30803	REEP3	XM_008270080
up	3.99724	2.96578	WEE1	XM_008266063				up	4.57044	3.43389	BNC2	XM_008254481
up	7.48252	6.45429	KDELR3	XM_002711393				up	5.55321	4.51353	GOLGA3	XM_008250024
up	5.14899	4.12084	AMMECR1L	XM_008258443				up	7.8361	6.29162	RPRD1B	XM_002710771
up	7.10564	6.0858	COL14A1	XM_002710753				up	3.99724	2.73414	WEE1	XM_008266063
up	3.55699	2.54167	FAM107B	XM_008268121				up	3.85577	2.44631	FBN2	XM_002710087
up	5.95931	4.9497	CLMP	XM_008260331				up	5.72635	4.70478	FMR1	XM_008273450
up	9.67271	8.66831	LOC100354444	XM_008265445				up	5.78795	4.69264	SLC4A7	NM_001195836
up	5.66783	4.6673	NUSAP1	XM_008269175				up	5.34614	4.0524	CD274	XM_008255121
down	1.48153	4.27092	DNAI1	XM_008273469				up	7.34542	5.398	OTUD3	XM_002716005
down	4.4335	6.78033	B3GAT2	XM_002714531				up	7.31835	5.76162	PRRC2B	XM_002721942
down	1.6421	3.75633	PPP1R1C	XM_002712322				up	9.08612	8.0425	LOC100345807	XM_008250213
down	5.65274	7.59152	SLC22A4	NM_001171346				down	2.32018	3.83184	CDKL2	NM_001081999
down	2.92408	4.82833	PLVAP	XM_002724464				down	3.42543	4.53774	ORYCUNV1R1504	NM_001167193
down	1.90626	3.759	MS4A3	XM_008271816				down	5.34946	6.46065	CHTF8	XM_008257543
down	2.35123	4.15615	PLP1	NM_001082328				down	2.96506	4.57386	GANAB	XM_002721007
down	2.1536	3.93252	LOC100343587	XM_008269595				down	3.20948	4.49366	LOC100350678	XM_002717866
down	6.1569	7.91322	GPR174	XM_002720136				down	8.46399	9.62114	LMAN1	XM_008261420
down	2.8806	4.63084	GFRA1	XM_002718758				down	4.96282	6.3277	LOC100009134	NM_001082298
down	7.20703	8.91579	LOC100345888	XM_008273365				down	7.07175	8.53917	CRTAP	XM_002716227
down	4.64774	6.29397	TMEM231	XM_008257630				down	5.88801	7.07895	GJA4	XM_002720698
down	3.02007	4.65181	NTM	XM_002708837				down	3.31783	4.37046	CDH17	XM_008255747
down	3.69345	5.31893	PTGER2	NM_001082659				down	5.66247	6.8473	DLEU7	XM_002720736
down	4.45614	6.02033	CCDC11	XM_002713531				down	7.84817	8.97446	MAPKAPK2	XM_008268496
down	3.20948	4.76292	LOC100350678	XM_002717866				down	3.88168	4.98082	NF1	XM_008271052
down	3.0084	4.55501	PLLP	XM_002711540				down	8.73939	9.94194	MFGE8	XM_002723373
down	2.95822	4.50429	TMTC3	XM_008256872				down	4.22094	5.31489	LOC100354917	XM_008266784
down	6.61058	8.07875	CYYR1	XM_002716774				down	4.58643	5.63986	SPECC1	XM_008270675
down	3.60501	5.06354	TTC5	XM_008269286				down	5.2153	6.74997	LOC100357206	XM_002709187
down	3.6815	5.12441	STK32C	XM_008253485				down	3.1112	4.15152	LOC103345104	XM_008248368
down	2.58121	4.00574	ACTL6B	XM_002711912				down	7.20703	8.74146	LOC100345888	XM_008273365
down	3.03089	4.43106	DYDC1	XM_002720972				down	4.89343	6.93326	LOC100341499	XM_008274075
down	3.1054	4.50003	SULT2A1	NM_001081987				down	8.69551	9.71486	PRCP	XM_008263350
down	2.53132	3.92478	CHST1	XM_002709072				down	3.12873	4.17202	MFI2	NM_001081992
down	3.33451	4.70343	HIF3A	XM_008252146				down	4.23908	5.24885	MAP3K3	XM_008271690
down	5.74939	7.10461	RFX7	XM_002717722				down	4.81298	5.82134	TRIM58	XM_008251805
down	4.96645	6.31626	PTPRR	XM_008256786				down	3.18573	4.35725	VWA2	XM_008270543
down	5.88801	7.23326	GJA4	XM_002720698				down	3.49865	5.73305	COL4A6	XM_008272864
down	3.18573	4.50218	VWA2	XM_008270543				down	3.87843	5.14862	TINAG	NM_001082786
down	3.09161	4.40086	VIP	XM_008263707				down	7.33003	8.9595	TRAPPC3	XM_002720685
down	3.02518	4.31603	CXHXorf58	XM_008272451				down	2.84334	3.89714	LRP11	XM_008249900
down	3.29128	4.5799	KIAA0247	XM_008248579				down	2.99213	4.00096	LOC100358696	XM_008264516
down	5.03758	6.32473	EZR	NM_001082122				down	2.53132	3.83626	CHST1	XM_002709072
down	7.00141	8.28757	TTC39C	XM_008261148				down	6.1569	7.42708	GPR174	XM_002720136
down	4.77511	6.06073	HCRTR1	XM_002720640				down	3.65775	5.80431	ANKDD1B	XM_008251109
down	3.88168	5.15715	NF1	XM_008271052				down	2.35123	3.87532	PLP1	NM_001082328
down	4.81298	6.08011	TRIM58	XM_008251805				down	5.23923	6.49159	GPD2	XM_002712189
down	3.12873	4.36504	MFI2	NM_001081992				down	4.31109	5.36033	VAMP7	XM_002722201
down	6.24606	7.47393	CD4	NM_001082313				down	6.0055	7.12545	MS4A4A	XM_008271854
down	4.95804	6.17274	HPSE	XM_002716982				down	6.59959	7.63273	PAFAH2	XM_002716106
down	4.57923	5.75487	KCNA10	NM_001082676				down	2.7926	3.87393	CREB5	XM_008261567
down	2.77819	3.93414	RAB9B	XM_008273049				down	4.77511	5.91654	HCRTR1	XM_002720640
down	2.9491	4.10458	TNR	XM_008263808				down	3.80114	4.87586	TAF9B	XM_002720226
down	4.10697	5.25511	TMEM138	XM_008274415				down	5.3511	6.41841	PEA15	XM_008264236
down	5.25967	6.40486	CDNF	XM_002717440				down	4.58523	5.6715	FAXC	XM_002714868
down	6.32606	7.46638	FAM171B	XM_002712331				down	3.73783	5.02092	GGH	XM_002710524
down	4.45981	5.5922	CUL7	XM_008262932				down	3.28201	4.52612	TUBGCP5	XM_008269727
down	6.99335	8.1234	GSTO2	XM_008270483				down	6.63541	7.96555	MRC1	XM_002717356
down	7.71819	8.84444	DGKH	XM_002712967				down	6.156	7.4173	RHBDD1	XM_008259252
down	6.06871	7.19437	SELL	NM_001082352				down	3.5317	4.5835	LOC100357474	XM_008257421
down	6.43647	7.55413	FAM229B	XM_002714930				down	5.75791	7.13373	HMGCS1	XM_008262167
down	6.75276	7.86501	SORL1	NM_001082664				down	4.42542	5.43092	RAPGEF4	XM_002712290
down	4.9226	6.03447	SLC24A2	XM_002708076				down	7.48003	8.67065	ESM1	XM_002714031
down	2.76252	3.86837	TRIM62	XM_008262291				down	8.28704	9.56908	ABCC9	NM_001082044
down	3.9348	5.03997	PPP1R32	XM_008274410				down	2.06438	4.24898	FMO5	NM_001082245
down	6.62609	7.72769	LOC100343300	XM_008257399				down	3.30265	4.38618	LOC100337773	XM_008249802
down	5.14111	6.24061	SLC35D2	XM_008257759				down	3.36449	5.2598	LOC100347283	XM_008249751
down	3.5317	4.62224	LOC100357474	XM_008257421				down	6.47931	7.5795	PROM1	XM_008274361
down	6.72155	7.80342	C17H15orf65	XM_008268977				down	4.52083	5.77405	PLEKHG1	XM_008263678
down	4.55403	5.63522	PGC	NM_001082634				down	5.24881	6.57357	MCHR2	XM_008263638
down	4.22094	5.29904	LOC100354917	XM_008266784				down	3.19365	4.73168	ACTBL2	XM_002714047
down	4.76505	5.8422	ALDH3A2	XM_008250350				down	5.59709	6.72221	SLC3A1	NM_001082242
down	2.92835	4.00269	FLT4	XM_002721324				down	5.73273	7.13962	SLC25A13	XM_008261705
down	3.90881	4.97923	N6AMT2	XM_008259931				down	8.44064	9.48994	THEM4	XM_008264434
down	2.86875	3.9375	NIPA1	XM_002718281				down	6.13068	7.13929	GNPDA1	XM_002710272
down	11.9298	12.9971	RGCC	XM_008260186				down	3.11215	4.43573	XKR4	XM_002710490
down	7.46913	8.53448	NOSTRIN	XM_008258703				down	7.48023	9.17626	ANGPTL7	XM_002723351
down	8.3061	9.36753	ASAH1	XM_008250904				down	2.61672	3.9943	TSGA10	XM_008253519
down	5.03804	6.09916	RMI2	XM_002711750				down	3.22206	4.23399	REEP4	XM_008249882
down	3.14288	4.19944	RABIF	XM_002717588				down	6.51247	7.82294	CXCR4	XM_002712124
down	9.49161	10.547	SLC13A3	XM_002721218				down	2.35451	3.8859	IAPP
down	6.74498	7.79874	CRTAP	XM_002716227
down	7.28259	8.32759	TSPAN7	XM_008272633
down	3.80547	4.85024	TMEM18	XM_002723189
down	5.01451	6.04839	GALM	XM_002709910
down	9.30427	10.338	GPR116	XM_008263015
down	5.54205	6.57397	CD180	XM_002714069
down	4.63686	5.66848	SSPN	NM_001082050
down	2.81048	3.83119	IDNK	XM_002721277
down	4.82132	5.83162	C7H2orf76	XM_008258477
down	5.41435	6.42464	SHPK	XM_002718868
down	3.44577	4.45579	LOC100354227	XM_002721022
down	3.42543	4.42847	ORYCUNV1R1504	NM_001167193
